# Supplementary material for: Qualification of an online device for the measurement of the oxidative potential of atmospheric particulate matter
Source: Copernicus journal article supplement (doi:10.5194/egusphere-2025-2021), 2025-05-26
Supplement: Supplementary file 1 [file egusphere-2025-2021-supplement.pdf]

# Qualification of an online device for the measurement of the oxidative potential of atmospheric particulate matter

Albane Barbero<sup>1</sup>, Guilhem Freche<sup>1</sup>, Luc Piard<sup>1</sup>, Lucile Richard<sup>1</sup>, Takoua Mhadhbi<sup>1</sup>, Anouk Marsal<sup>1</sup>, Stephan Houdier<sup>1</sup>, Julie Camman<sup>1,2</sup>, Mathilde Brezins<sup>1,2</sup>, Benjamin Golly<sup>3</sup>, Jean-Luc Jaffrezo<sup>1</sup>, Gaëlle Uzu<sup>1</sup>

<sup>1</sup>Univ. Grenoble Alpes, CNRS, INRAE, IRD, Grenoble INP\*, IGE, 38000 Grenoble, France\*Institute of Engineering and Management Univ. Grenoble Alpes

<sup>2</sup>Aix Marseille Univ., CNRS, LCE, UMR 7376, 13331 Marseille, France

<sup>3</sup>Univ. Savoie Mont Blanc, CNRS, LOCIE (UMR 5271), 73376, Le Bourget-du-Lac, France

Correspondence to: Albane Barbero (albane.barbero@univ-grenoble-alpes.fr)

## 1 ROS-Online answer under semi-controlled environment

### 1.1 Atmospheric OP in near real conditions

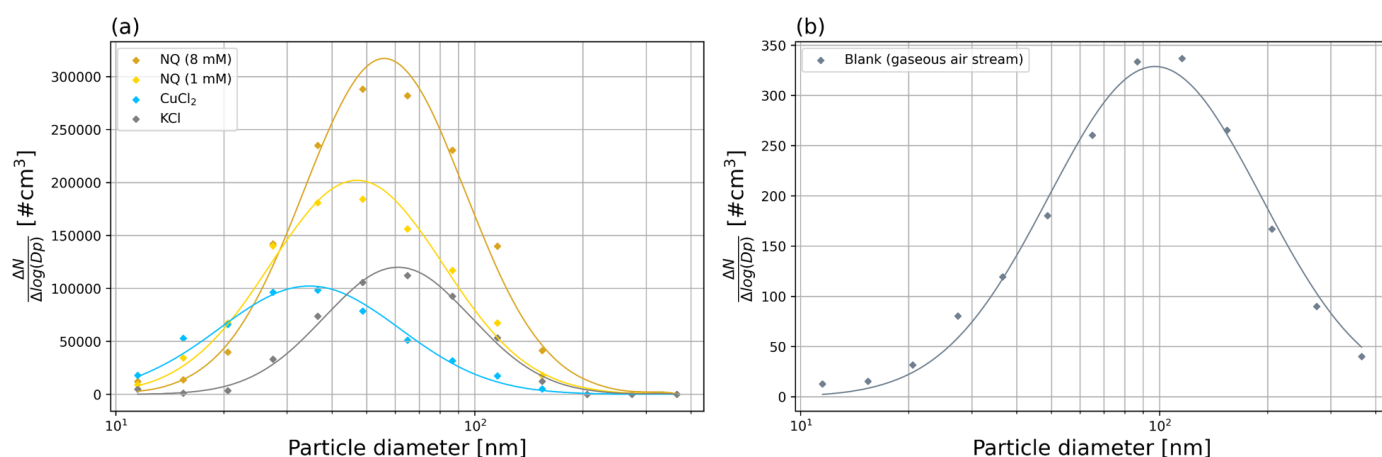

Figure S 1. particle size and distribution found in the pipe in (a) the four experiments generating respectively atomized KCl, CuCl<sub>2</sub>, and NQ at 1mM and 8 mM and (b) the gaseous air stream blank

### 1.2 ROS-Online answer to gas

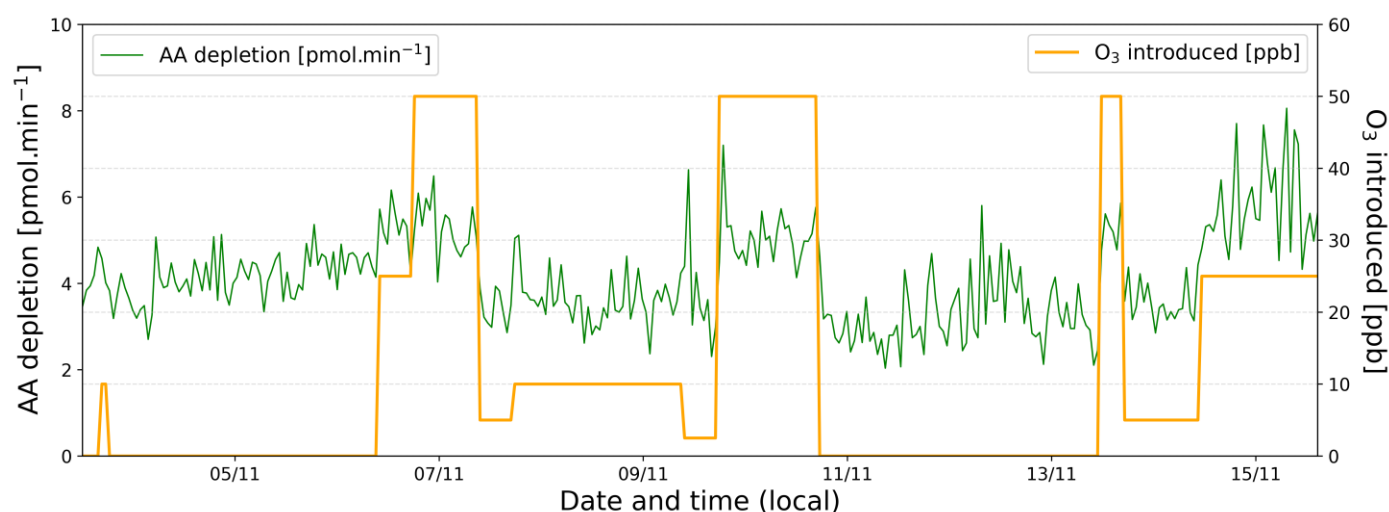

Figure S 2. Timeserie of AA depletion [pmol.min<sup>-1</sup>] (green) measured at different O<sub>3</sub> (orange) concentrations [ppb] introduced in the sampling line of ROS-Online.

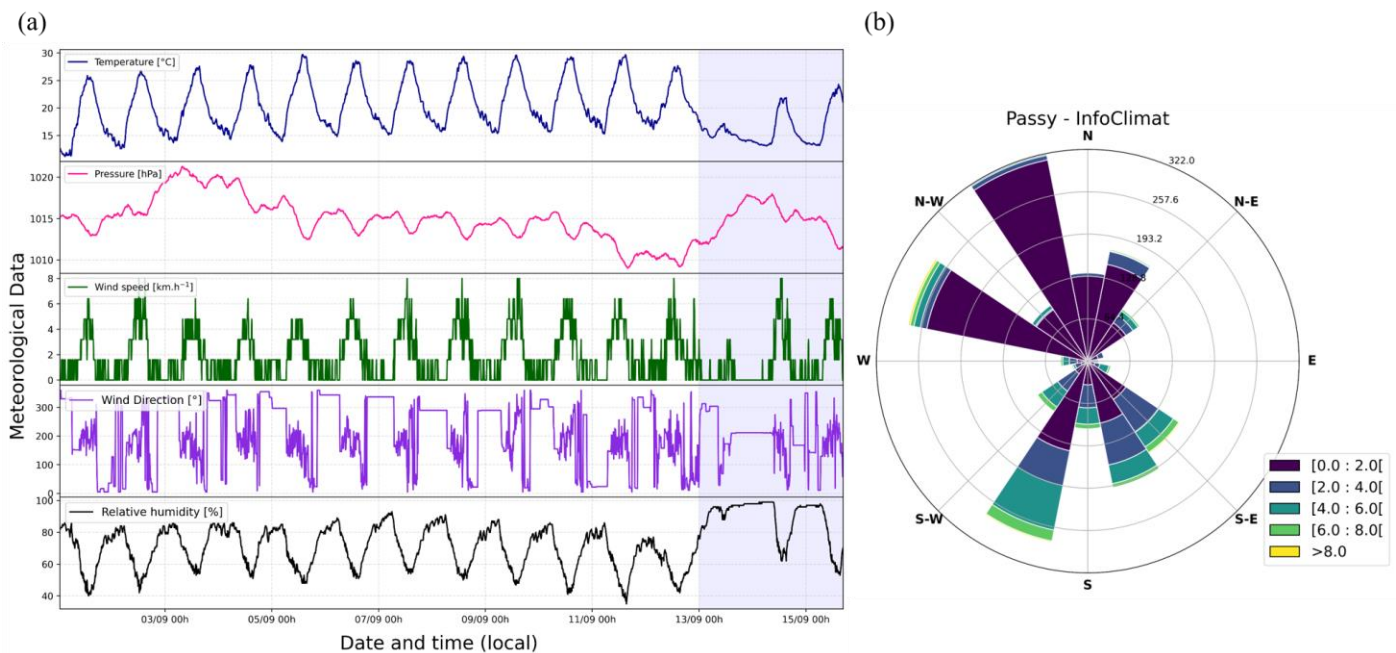

Figure S 3. Meteorological data at the air quality monitoring station of “Passy” during the ambient air OP sampling campaign (a) Temperature (°C - dark blue), Dew point (°C - dashed light blue), Pressure (hPa - pink), Wind speed (km.h<sup>-1</sup> - green), Wind direction (° - purple) and Relative humidity (%) - black). (b) The associated Wind Rose.

25 2.1 Time series - OP<sup>AA</sup>

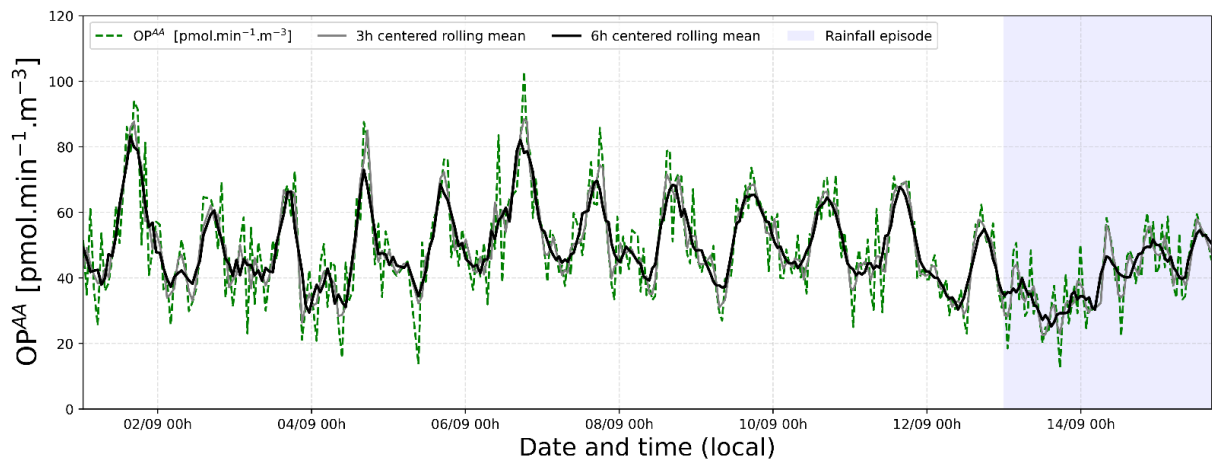

Figure S 4: Time series of OP<sup>AA</sup> [pmol.min<sup>-1</sup>.m<sup>-3</sup>] measurements during the 15 days’ field campaign in Chamonix.

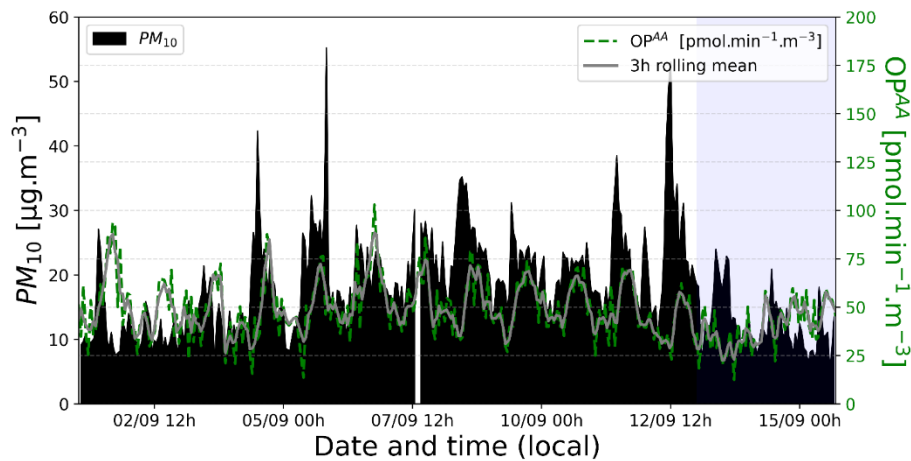

30 **Figure S 5: Time series of PM<sub>10</sub> [ $\mu\text{g}.\text{m}^{-3}$ ] (left-hand side) and OP<sup>AA</sup> [ $\text{pmol}.\text{min}^{-1}.\text{m}^{-3}$ ] (right-hand side) measurements during the 15 days' field campaign in Chamonix.**

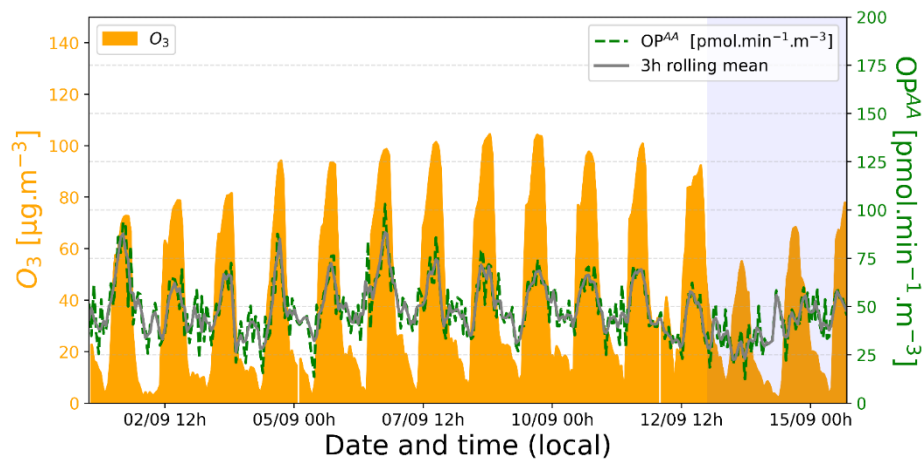

35 **Figure S 6: Time series of O<sub>3</sub> [ $\mu\text{g}.\text{m}^{-3}$ ] (left-hand side) and OP<sup>AA</sup> [ $\text{pmol}.\text{min}^{-1}.\text{m}^{-3}$ ] (right-hand side) measurements during the 15 days' field campaign in Chamonix**

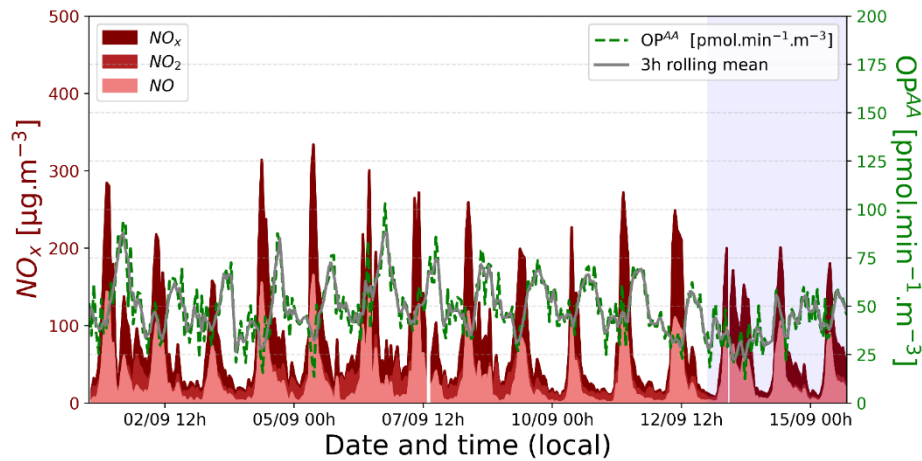

40 **Figure S 7: Time series of NO<sub>x</sub> [ $\mu\text{g}.\text{m}^{-3}$ ] (left-hand side) and OP<sup>AA</sup> [ $\text{pmol}.\text{min}^{-1}.\text{m}^{-3}$ ] (right-hand side) measurements during the 15 days' field campaign in Chamonix.**

## 2.2 Time series – OP<sup>DTT</sup>

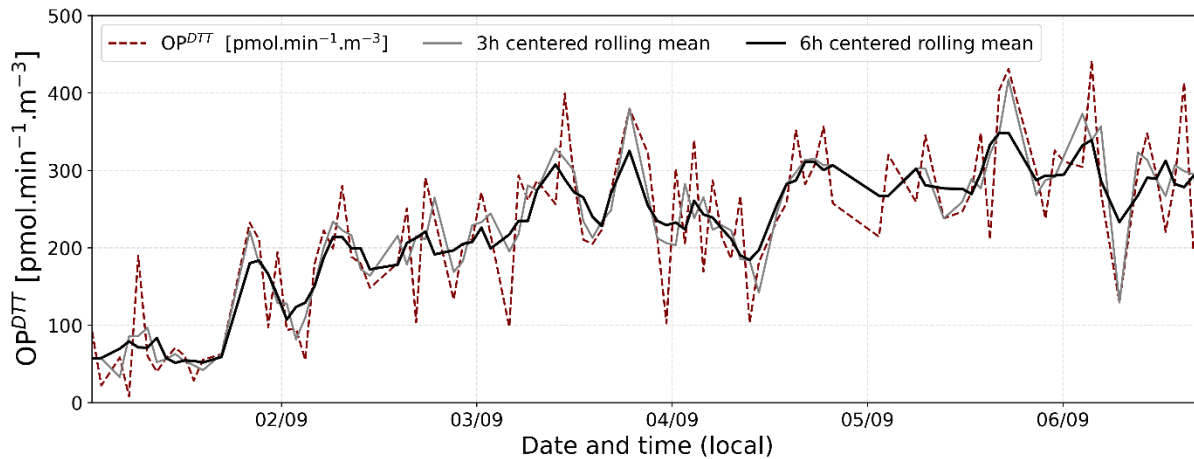

**Figure S 8: Time series of OP<sup>DTT</sup> [ $\text{pmol}.\text{min}^{-1}.\text{m}^{-3}$ ] measurements during the 6 days' field campaign in Chamonix.**

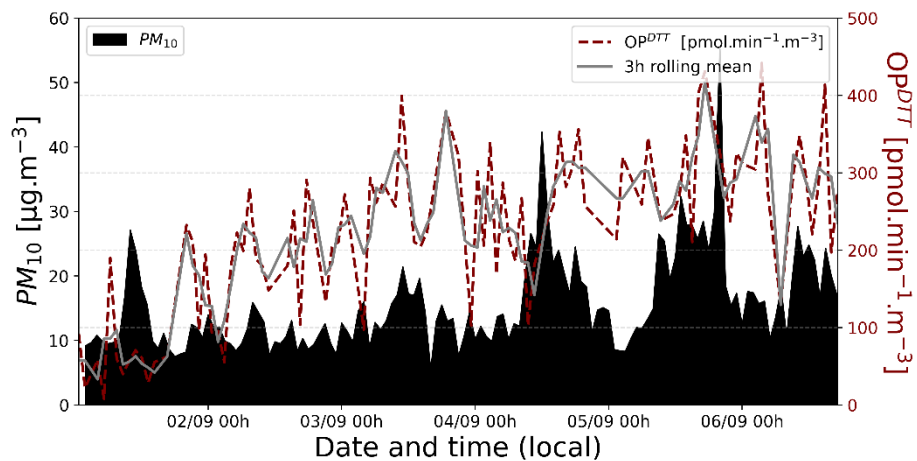

45 **Figure S 9:** Time series of PM<sub>10</sub> [ $\mu\text{g.m}^{-3}$ ] (left-hand side) and OP<sup>DTT</sup> [ $\text{pmol.min}^{-1}.\text{m}^{-3}$ ] (right-hand side) measurements during the 6 days' field campaign in Chamonix.

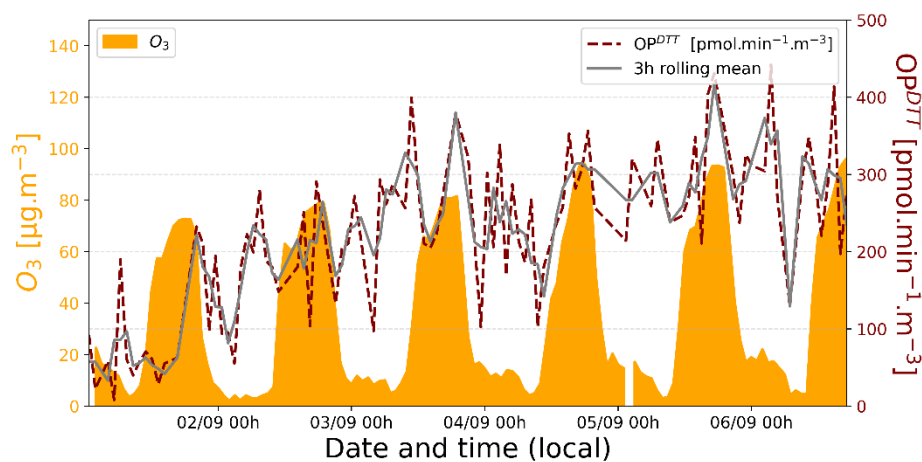

50 **Figure S 10:** Time series of O<sub>3</sub> [ $\mu\text{g.m}^{-3}$ ] (left-hand side) and OP<sup>DTT</sup> [ $\text{pmol.min}^{-1}.\text{m}^{-3}$ ] (right-hand side) measurements during the 6 days' field campaign in Chamonix.

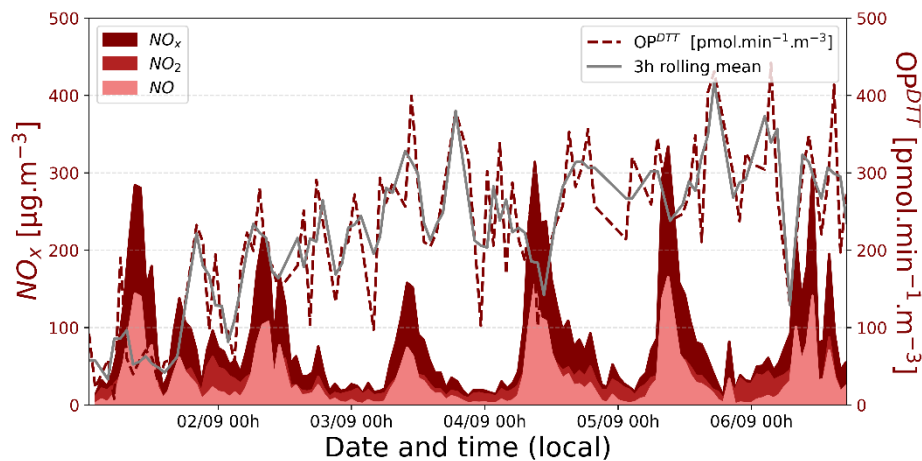

55 **Figure S 11:** Time series of NO<sub>x</sub> [ $\mu\text{g.m}^{-3}$ ] (left-hand side) and OP<sup>DTT</sup> [ $\text{pmol.min}^{-1}.\text{m}^{-3}$ ] (right-hand side) measurements during the 6 days' field campaign in Chamonix.
